# Supplementary material
Source: Springer Nature journal article supplement (https://www.springermedizin.de/resource/supplementary/12891_2008_536_MOESM3_ESM.pdf/9511258)

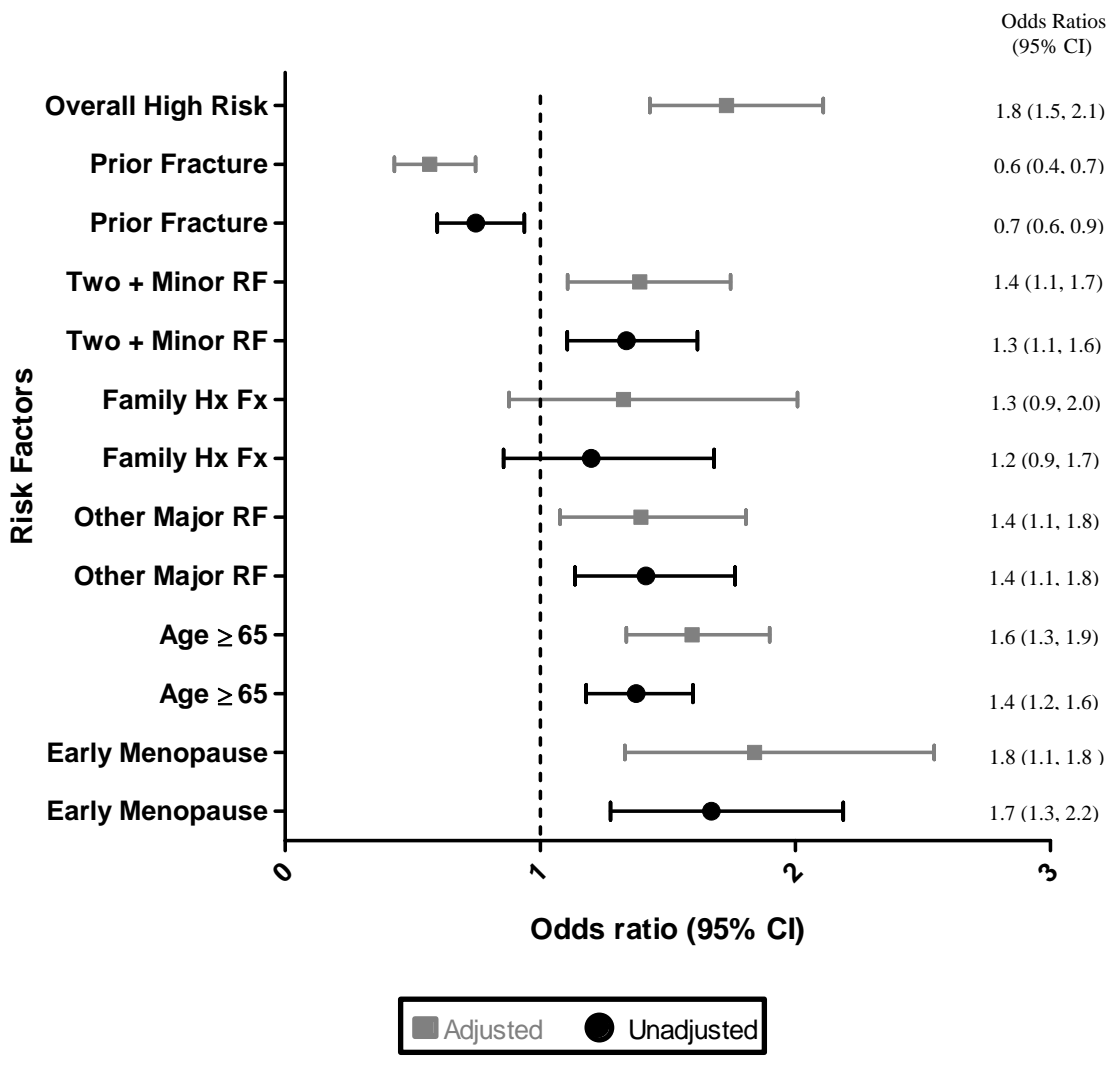

Supplement: MOESM3 [file 9511258]
